# Supplementary material for: Efficacy and Safety of Dapagliflozin According to Frailty in Patients With Heart Failure: A Prespecified Analysis of the DELIVER Trial
Source: PubMed Central journal article supplement — Circulation. 2022 Aug 27;146(16):1210–24. doi: 10.1161/CIRCULATIONAHA.122.061754 (PMC9815819; doi:10.1161/circulationaha.122.061754), 2022-08-27
Supplement: cir-146-1210-s001.pdf [file cir-146-1210-s001.pdf]

## **SUPPLEMENTAL MATERIAL**

**Table S1. Components of the Frailty Index**

| Number                          | Component                             | Cut-off                               | Score |
|---------------------------------|---------------------------------------|---------------------------------------|-------|
| <i>Laboratory measures</i>      |                                       |                                       |       |
| 1                               | Creatinine, umol/L                    | <40 or >150                           | 1     |
| <i>Comorbidities</i>            |                                       |                                       |       |
| 2                               | Myocardial infarction                 | History                               | 1     |
| 3                               | PCI or CABG                           | History                               | 1     |
| 4                               | Angina pectoris                       | History                               | 1     |
| 5                               | Peripheral artery disease*            | History                               | 1     |
| 6                               | Atrial fibrillation/flutter           | Present/history                       | 1     |
| 7                               | Heart valvular disease                | History                               | 1     |
| 8                               | Pulmonary embolism                    | History                               | 1     |
| 9                               | Pacemaker                             | History                               | 1     |
| 10                              | Type 2 diabetes                       | History                               | 1     |
| 11                              | Hypertension                          | History                               | 1     |
| 12                              | Chronic obstructive pulmonary disease | History                               | 1     |
| 13                              | Stroke/TIA                            | History                               | 1     |
| 14                              | Gout                                  | History                               | 1     |
| 15                              | Cancer                                | History                               | 1     |
| 16                              | Chronic kidney disease**              | History                               | 1     |
| 17                              | Syncope                               | History                               | 1     |
| 18                              | Sleep apnea                           | History                               | 1     |
| 19                              | Neuropathy                            | History                               | 1     |
| 20                              | Dyslipidemia                          | History                               | 1     |
| 21                              | Osteoporosis                          | History                               | 1     |
| <i>Other measures</i>           |                                       |                                       |       |
| 22                              | Body mass index, kg/m <sup>2</sup>    | <18.5 or ≥30                          | 1     |
|                                 |                                       | 25-29                                 | 0.5   |
| 23                              | Systolic blood pressure, mmHg         | ≤90 or ≥140                           | 1     |
| 24                              | Diastolic blood pressure, mmHg        | ≥90                                   | 1     |
| 25                              | Pulse pressure, mmHg                  | >55                                   | 1     |
| <i>Quality of life measures</i> |                                       |                                       |       |
| 26                              | Self-care                             | No problems washing or dressing       | 0     |
|                                 |                                       | Slightly problems washing or dressing | 0.25  |
|                                 |                                       | Moderate problems washing or dressing | 0.50  |
|                                 |                                       | Severe problems washing or dressing   | 0.75  |

|    |                       |                                             |      |
|----|-----------------------|---------------------------------------------|------|
|    |                       | Unable to wash or dress                     | 1    |
| 27 | Usual activities      | No problems doing my usual activities       | 0    |
|    |                       | Slightly problems doing my usual activities | 0.25 |
|    |                       | Moderate problems doing my usual activities | 0.50 |
|    |                       | Severe problems doing my usual activities   | 0.75 |
|    |                       | Unable to do my usual activities            | 1    |
| 28 | Pain/discomfort       | No pain or discomfort                       | 0    |
|    |                       | Slight pain or discomfort                   | 0.25 |
|    |                       | Moderate pain or discomfort                 | 0.50 |
|    |                       | Severe pain or discomfort                   | 0.75 |
|    |                       | Extreme pain or discomfort                  | 1    |
| 29 | Anxiety or depression | Not anxious or depressed                    | 0    |
|    |                       | Slightly anxious or depressed               | 0.25 |
|    |                       | Moderately anxious or depressed             | 0.50 |
|    |                       | Severely anxious or depressed               | 0.75 |
|    |                       | Extremely anxious or depressed              | 1    |
| 30 | Mobility              | No problems in walking about                | 0    |
|    |                       | Slightly problems in walking about          | 0.25 |
|    |                       | Moderate problems in walking about          | 0.50 |
|    |                       | Severe problems in walking about            | 0.75 |
|    |                       | Unable to walk about                        | 1    |

*CABG, coronary artery bypass graft surgery; PCI, percutaneous coronary intervention; TIA, transient ischemic attack.*

*\*History of peripheral arterial occlusive disease, renal artery stenosis, aneurism of abdominal aorta, or non-coronary revascularization.*

*\*\*Defined as estimated glomerular filtration rate <60 ml/min/1.73 cm<sup>2</sup>.*

**Table S2. Number of patients with missing data for the components of the Frailty Index**

| Number of missing components | DELIVER<br>N=6,263 |
|------------------------------|--------------------|
| None                         | 5,738 (91.62)      |
| 1 (3.3%)                     | 4 (0.06)           |
| 2 (6.7%)                     | 1 (0.02)           |
| 5 (16.7%)                    | 515 (8.22)         |
| 6 (20.0%)                    | 3 (0.05)           |
| 8 (26.7%)                    | 2 (0.03)           |

*Patients with  $\geq 20\%$  missing items were excluded. In the present study, 5 patients were excluded.*

**Table S3. Components of the Frailty Index with missing data**

| Components with missing data                    | DELIVER<br>N=6,263 |
|-------------------------------------------------|--------------------|
| Other measures, N (%)                           |                    |
| Body mass index                                 | 6 (0.1)            |
| Laboratory measures, N (%)                      |                    |
| Creatinine, N (%)                               | 1 (0.02)           |
| EuroQoL-5 Domain Questionnaire, N (%)           |                    |
| Self-care                                       | 518 (8.3)          |
| Usual activities                                | 518 (8.3)          |
| Pain/discomfort                                 | 518 (8.3)          |
| Anxiety or depression                           | 518 (8.3)          |
| Mobility                                        | 518 (8.3)          |
| Comorbidities, N (%)                            |                    |
| Peripheral artery disease                       | 2 (0.03)           |
| Atrial fibrillation/flutter (history or on ECG) | 1 (0.02)           |
| Pulmonary embolism                              | 2 (0.03)           |
| Chronic obstructive pulmonary disease           | 2 (0.03)           |
| Gout                                            | 2 (0.03)           |
| Cancer                                          | 2 (0.03)           |
| Chronic kidney disease                          | 1 (0.02)           |
| Sleep apnea                                     | 2 (0.03)           |
| Neuropathy                                      | 2 (0.03)           |
| Osteoporosis                                    | 2 (0.03)           |

ECG, electrocardiogram.

**Figure S1. Distribution of Frailty Index**

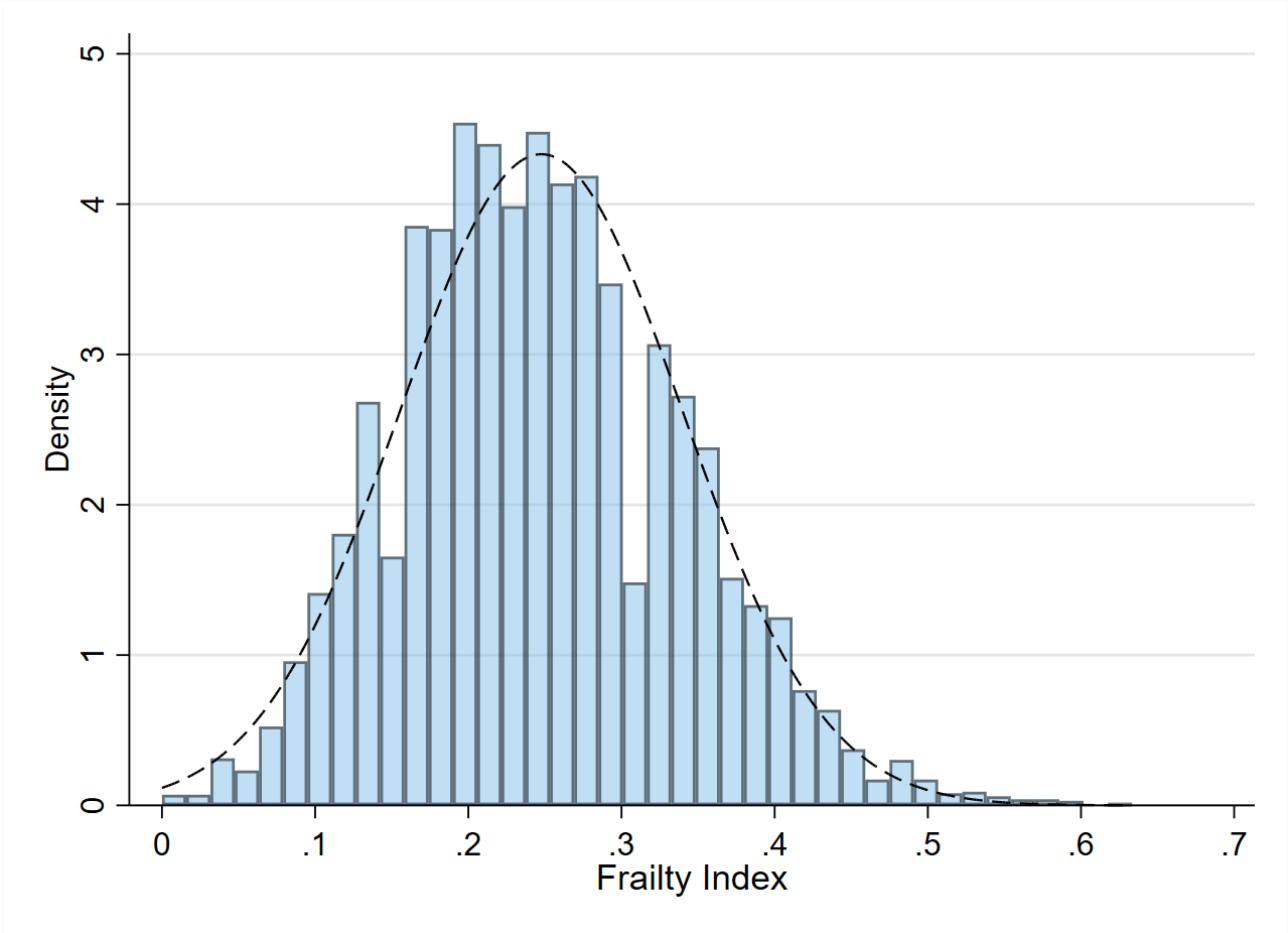

*Higher Frailty Index indicates greater frailty.*
